# Supplementary material for: Characterization and Functionality of Immidazolium Ionic Liquids Modified Magnetic Nanoparticles
Source: Hindawi journal article supplement (doi:10.1155/2013/861021), 2013-01-01
Supplement: f1 [file 861021.f1.docx]

Support Information

**Characterization and functionality of immidazolium ionic liquids-modified magnetic nanoparticles**

Ying Li1,2, Ning Tang2, Fuyuhiko Inagaki1, Chisato Mukai1, and Kazuichi Hayakawa1

1Institute of Medical, Pharmaceutical and Health Sciences, Kanazawa University, Kakuma-machi, Kanazawa, 920-1192, Japan

2Department of Chemical and Chemical Engineering, Henan Institute of Science and Technology, Xinxiang, Henan, 453003, P. R. China

1H-NMR spectrum of ionic liquid 1-octyl-3-(3-triethoxysilylpropyl)-4,5-dihydroimidazolium hexafluorophosphate (OTIMPF6) δ: 7.80 (s, 1H, N-C*H*-N), 3.94-3.91 (m, 4H, CH2-C*H*2-N-Oct, N-C*H*2-(CH2)6-CH3), 3.81 (q, 6H, *J* = 7.3 Hz, O-C*H*2-CH3), 3.42 (t, 2H, *J* = 7.3 Hz, N-C*H*2-CH2-N-Oct), 3.38 (t, 2H, *J* = 7.3 Hz, N-C*H*2-(CH2)2-Si), 1.74 (quin, 2H, *J* = 7.6 Hz, C*H*2-(CH2)5-CH3), 1.65-1.60 (m, 2H, Si-CH2-C*H*2), 1.29-1.25 (m, 10H, CH2-(C*H*2)5-CH3), 1.29 (t, 9H, *J* = 7.3 Hz, O-CH2-C*H*3), 0.86 (t, 3H, *J* = 7.0 Hz, CH2-CH2-C*H*3), 0.59-0.56 (m, 2H, Si-C*H*2-CH2);


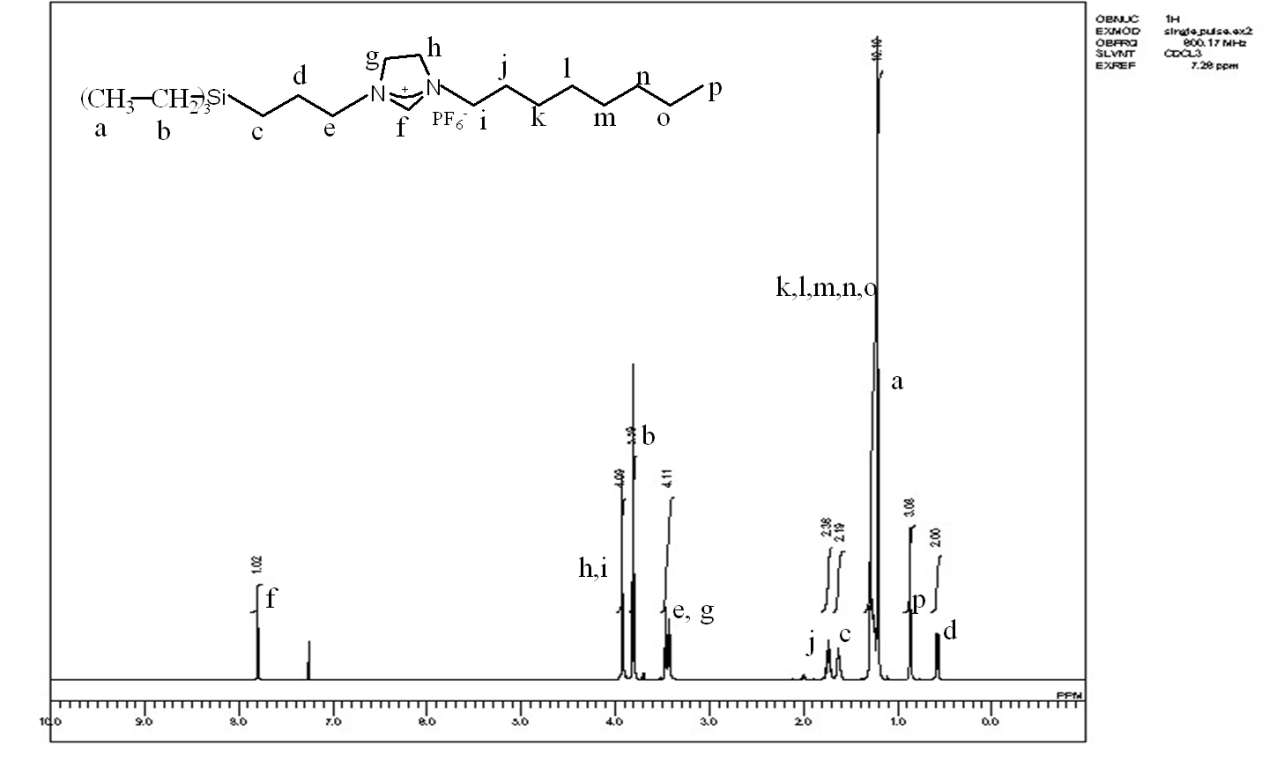


Figure S1 Spectra of 1H-NMR of OTIMPF6

13C-NMR spectrum of ionic liquid 1-octyl-3-(3-triethoxysilylpropyl)-4,5-dihydroimidazolium hexafluorophosphate (OTIMPF6) δ: 156.9 (N-*C*H-N), 58.5 (O-*C*H2-CH3), 50.2, 48.4, 48.2, 48.0 (*C*H2-CH2-N-Oct, CH2-*C*H2-N-Oct, N-*C*H2-(CH2)2-Si, N-*C*H2-(CH2)6-CH3), 31.7 (*C*H2-(CH2)5-CH3), 29.00 (*C*H2-(CH2)4-CH3), 28.96 (*C*H2-(CH2)3-CH3), 27.1 (*C*H2-(CH2)2-CH3), 26.3 (*C*H2-CH2-CH3), 22.5 (Si-CH2-*C*H2), 20.8 (CH2-*C*H2-CH3), 18.2 (O-*C*H2-CH3), 14.0 (CH2-CH2-*C*H3), 6.9 (Si-*C*H2-CH2).

**
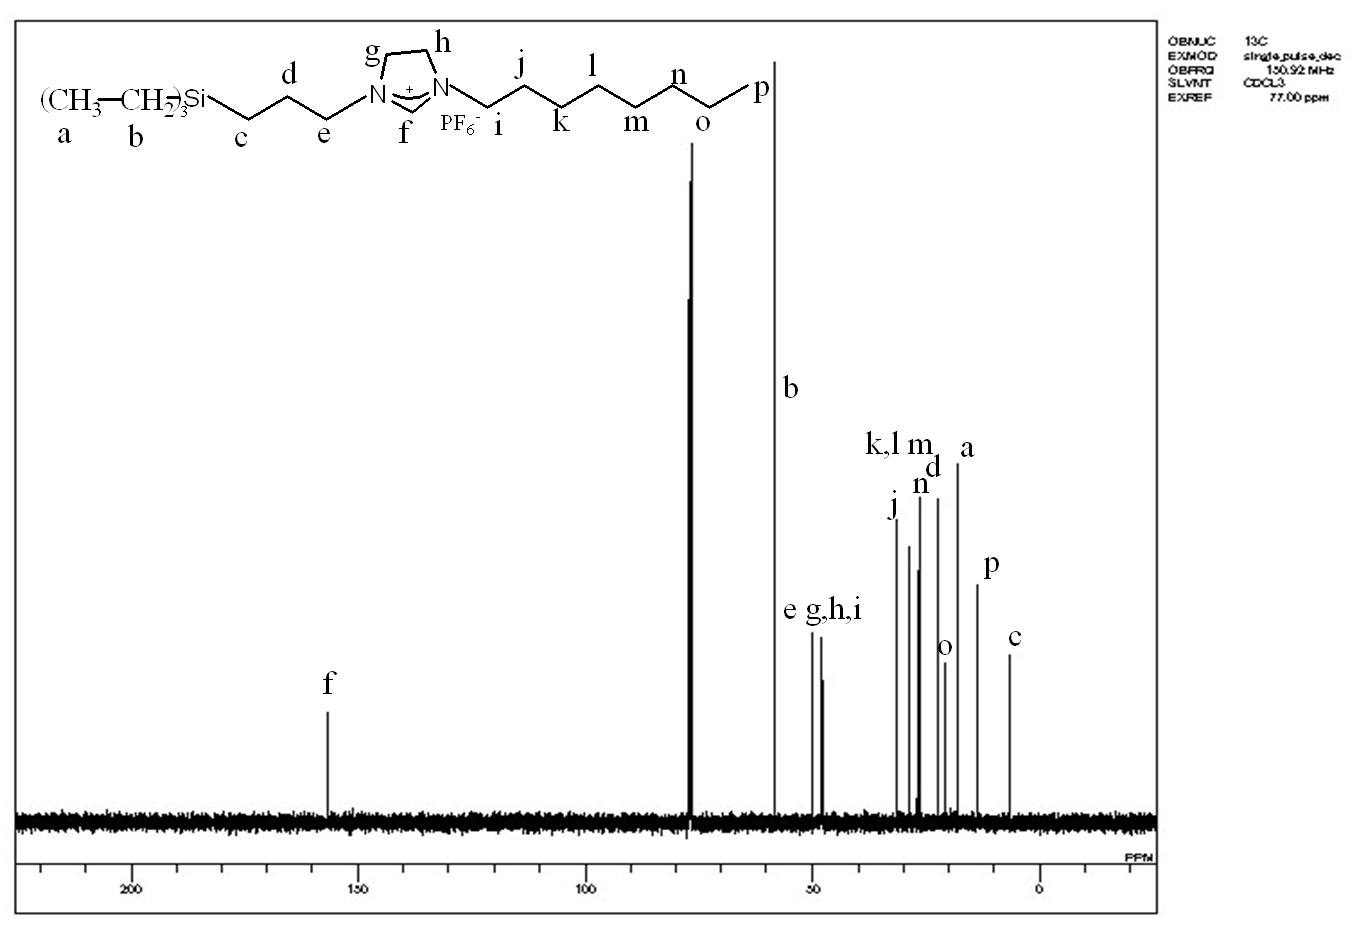
**

Figure S2 Spectra of 13C-NMR of OTIMPF6
